# Supplementary material
Source: PubMed Central journal article supplement (PMC7350990)

# Supplemental Material

## **GFR in Healthy Ageing: An Individual Participant Data Meta- Analysis of Iohexol Clearance in European Population-based Cohorts**

Bjørn O. Eriksen<sup>1,2</sup> M.D. Ph.D., Runolfur Palsson<sup>3,4</sup> M.D., Natalie Ebert<sup>5</sup> M.D, M.P.H.,  
Toralf Melsom<sup>1,2</sup> M.D. Ph.D., Markus van der Giet<sup>6</sup> M.D., Vilmundur Gudnason<sup>4,7</sup> M.D,  
Ph.D., Olafur S. Indridasson<sup>3</sup> M.D., M.H.S., Lesley A. Inker<sup>8</sup> M.D., M.S., Trond G. Jenssen<sup>1,9</sup>  
M.D. Ph.D., Andrew S. Levey<sup>8</sup> M.D., Marit. D. Solbu<sup>1,2</sup> M.D. Ph.D., Hocine Tighiouart<sup>10,11</sup>  
M.S., Elke Schaeffner<sup>5</sup> M.D, M.Sc.

# Table of Contents

|                                                                                                                                                                          |    |
|--------------------------------------------------------------------------------------------------------------------------------------------------------------------------|----|
| Supplemental Methods .....                                                                                                                                               | 3  |
| The generalized additive regression model for location, scale and shape .....                                                                                            | 3  |
| Supplemental References .....                                                                                                                                            | 4  |
| Tables .....                                                                                                                                                             | 5  |
| Table S1. Missing data in RENIS-T6, RENIS-FU, BIS and AGES-Kidney. ....                                                                                                  | 5  |
| Table S2. Characteristics of the study population according to health status .....                                                                                       | 6  |
| Table S3. General additive mixed model analysis of GFR mean and standard deviation in<br>three population-based cohorts. Fixed and random effects. ....                  | 7  |
| Table S4. General additive mixed model analysis of GFR mean and standard deviation in<br>three population-based cohorts. Fixed cohort effects. ....                      | 8  |
| Table S5. Predicted percentiles of GFR (mL/min/1.73 m <sup>2</sup> ) for healthy women and men<br>according to age group. ....                                           | 8  |
| Table S6. General additive mixed model analysis of creatinine-based eGFR mean and<br>standard deviation in three population-based cohorts. Fixed and random effects..... | 10 |
| Figures .....                                                                                                                                                            | 12 |
| Figure S1. Histogram of the residuals for the final GAMLSS model .....                                                                                                   | 12 |
| Figure S2. GFR-age association for the GAMLSS models, stratified according to age and<br>sex.....                                                                        | 13 |

## Supplemental Methods

The generalized additive regression model for location, scale and shape

In ordinary regression analyses, the distribution of the dependent variable is commonly assumed to be normal conditional on the independent variables. The mean of this distribution is estimated as a function of the independent variables, whereas its variance is assumed to be constant. However, in many real-life situations the variance may also be a function of the independent variables, and the distribution of the dependent variable may exhibit both skewness and kurtosis. In a generalized additive regression model for location, scale and shape (GAMLSS),<sup>1,2</sup> the parameters describing all these properties of the distribution of the dependent variable (the variance, skewness and kurtosis) can be estimated as separate functions of the independent variables. These functions may be non-linear and are often modeled as splines of the independent variables.

The GAMLSS provides great flexibility in modeling population data, and percentiles of the conditional distribution of the dependent variable can be estimated to calculate reference intervals for e.g. age-dependent variables. The WHO has recommended this statistical method for establishing length and weight standards for children.<sup>3</sup>

## Supplemental References

1. Rigby, RA, Stasinopoulos, DM: Generalized Additive Models for Location, Scale and Shape. *J R Stat Soc Ser C Appl Statist*, 54: 507-554, 2005.
2. Wood, SN: *Generalized Additive Models. An Introduction with R.*, Boca Raton, CRC Press, 2017.
3. World Health Organization: *WHO child growth standards: length/height for age, weight-for-age, weight-for-length, weight-for-height and body mass index-for-age, methods and development*, World Health Organization, 2006.

## Tables

**Table S1. Missing data in RENIS-T6, RENIS-FU, BIS and AGES-Kidney.**

|                                            | RENIS-T6      | RENIS-Follow Up | BIS          | AGES-Kidney  |
|--------------------------------------------|---------------|-----------------|--------------|--------------|
| Number of participants                     | 1627          | 1324            | 570          | 805          |
| Age (years)                                | 0 (0.0 %)     | 0 (0.0 %)       | 0 (0.0 %)    | 0 (0.0 %)    |
| Male sex                                   | 0 (0.0 %)     | 0 (0.0 %)       | 0 (0.0 %)    | 0 (0.0 %)    |
| Body weight (kg)                           | 0 (0.0 %)     | 0 (0.0 %)       | 0 (0.0 %)    | 0 (0.0 %)    |
| Height (cm)                                | 0 (0.0 %)     | 0 (0.0 %)       | 0 (0.0 %)    | 0 (0.0 %)    |
| Body mass index (kg/m <sup>2</sup> )       | 0 (0.0 %)     | 0 (0.0 %)       | 0 (0.0 %)    | 0 (0.0 %)    |
| Body surface area (m <sup>2</sup> )        | 0 (0.0 %)     | 0 (0.0 %)       | 0 (0.0 %)    | 0 (0.0 %)    |
| Urinary albumin-to-creatinine ratio (mg/g) | 5 (0.3 %)     | 0 (0.0 %)       | 6 (1.1 %)    | 3 (0.4 %)    |
| Smoking                                    | 0 (0.0 %)     | 0 (0.0 %)       | 0 (0.0 %)    | 54 (6.7 %)   |
| Myocardial infarction                      | 0 (0.0 %)     | 0 (0.0 %)       | 8 (1.4 %)    | 0 (0.0 %)    |
| Myocardial revascularization               | 0 (0.0 %)     | 0 (0.0 %)       | 6 (1.1 %)    | 0 (0.0 %)    |
| Angina pectoris                            | 0 (0.0 %)     | 0 (0.0 %)       | 0 (0.0 %)    | 0 (0.0 %)    |
| Stroke                                     | 0 (0.0 %)     | 0 (0.0 %)       | 5 (0.9 %)    | 0 (0.0 %)    |
| Diabetes                                   | 0 (0.0 %)     | 0 (0.0 %)       | 0 (0.0 %)    | 0 (0.0 %)    |
| Cancer                                     | 0 (0.0 %)     | 0 (0.0 %)       | 2 (0.4 %)    | 0 (0.0 %)    |
| Systolic blood pressure (mmHg)             | 0 (0.0 %)     | 0 (0.0 %)       | 1 (0.2 %)    | 2 (0.2 %)    |
| Diastolic blood pressure (mmHg)            | 0 (0.0 %)     | 0 (0.0 %)       | 1 (0.2 %)    | 2 (0.2 %)    |
| Antihypertensive medication                | 0 (0.0 %)     | 0 (0.0 %)       | 0 (0.0 %)    | 31 (3.9 %)   |
| Digoxin or digitoxin                       | 0 (0.0 %)     | 0 (0.0 %)       | 0 (0.0 %)    | 31 (3.9 %)   |
| Lipid lowering medication                  | 0 (0.0 %)     | 0 (0.0 %)       | 0 (0.0 %)    | 31 (3.9 %)   |
| Anti-diabetic medication                   | 0 (0.0 %)     | 0 (0.0 %)       | 0 (0.0 %)    | 31 (3.9 %)   |
| Absolute GFR (mL min <sup>-1</sup> )       | 0 (0.0 %)     | 0 (0.0 %)       | 0 (0.0 %)    | 0 (0.0 %)    |
| Participants without missing data          | 1622 (99.7 %) | 1324 (100.0 %)  | 547 (96.0 %) | 716 (88.9 %) |

Data are shown as n(percent).

Abbreviations: RENIS-T6, Renal Iohexol Clearance in Tromsø 6; RENIS-FU Study, the Renal Iohexol-clearance Survey Follow-up Study; BIS, Berlin Initiative Study; AGES-Kidney, Age, Gene/Environment Susceptibility - Kidney Study; GFR, glomerular filtration rate .

**Table S2. Characteristics of the study population<sup>a</sup> according to health status**

|                                                                             | Unhealthy    | Healthy <sup>b</sup> |
|-----------------------------------------------------------------------------|--------------|----------------------|
| Number of observations, n (%)                                               | 3274 (100.0) | 935 (100.0)          |
| Age (SD), years                                                             | 67.8 (10.2)  | 60.8 (6.6)           |
| Male sex, n (%)                                                             | 1673 (51.1)  | 409 (43.7)           |
| Body weight (SD), kg                                                        | 80.4 (14.8)  | 73.4 (10.8)          |
| Height (SD), cm                                                             | 169.3 (9.0)  | 170.3 (8.7)          |
| Body mass index (SD), kg/m <sup>2</sup>                                     | 28.0 (4.3)   | 25.2 (2.5)           |
| Body surface area (SD), m <sup>2</sup>                                      | 1.9 (0.2)    | 1.8 (0.2)            |
| Cardiovascular disease                                                      |              |                      |
| Myocardial infarction, n (%)                                                | 191 (5.9)    | 0 (0.0)              |
| Myocardial revascularization, n (%)                                         | 237 (7.3)    | 0 (0.0)              |
| Angina pectoris, n (%)                                                      | 130 (4.0)    | 0 (0.0)              |
| Stroke, n (%)                                                               | 122 (3.8)    | 0 (0.0)              |
| Diabetes, n (%)                                                             | 278 (8.5)    | 0 (0.0)              |
| Cancer, n (%)                                                               | 453 (13.8)   | 0 (0.0)              |
| Hypertension <sup>b</sup> , n (%)                                           | 2511 (76.7)  | 0 (0.0)              |
| Systolic blood pressure (SD), mmHg                                          | 138.1 (19.6) | 120.2 (10.4)         |
| Diastolic blood pressure (SD), mmHg                                         | 81.4 (12.2)  | 77.3 (7.4)           |
| Antihypertensive medication, n (%)                                          | 1667 (50.9)  | 0 (0.0)              |
| Digoxin or digitoxin, n (%)                                                 | 49 (1.5)     | 0 (0.0)              |
| Lipid lowering medication, n (%)                                            | 827 (25.3)   | 0 (0.0)              |
| Anti-diabetic medication, n (%)                                             | 154 (4.7)    | 0 (0.0)              |
| Smoking                                                                     |              |                      |
| Never, n (%)                                                                | 1109 (33.9)  | 384 (41.1)           |
| Current, n (%)                                                              | 595 (18.2)   | 0 (0.0)              |
| Previous, n (%)                                                             | 1570 (48.0)  | 551 (58.9)           |
| Absolute GFR (SD), mL/min                                                   | 89.1 (27.1)  | 96.9 (18.9)          |
| Body surface indexed GFR (SD), mL/min/ 1.73m <sup>2</sup>                   | 80.3 (21.6)  | 90.6 (14.4)          |
| CKDEPI estimate of GFR based on creatinine (SD), mL/min/ 1.73m <sup>3</sup> | 82.4 (18.2)  | 91.4 (10.6)          |
| Urinary albumin-creatinine ratio ≥ 30.0 mg/g, n (%)                         | 286 (8.7)    | 0 (0.0)              |
| Urinary albumin-to-creatinine ratio ≥ 300.0 mg/g, n (%)                     | 37 (1.1 %)   | 0 (0.0 %)            |

Data are shown as mean (standard deviation) or n (percent).

Abbreviation: GFR, glomerular filtration rate; SD, standard deviation; CKDEPI, Chronic Kidney Disease Epidemiology Collaboratio.

<sup>a</sup>The study population comprises both the baseline and follow-up examinations of the RENIS cohort (RENIS-T6 and RENIS-FU), which means that the standard deviations in the table should be interpreted with caution.

<sup>b</sup>"Healthy" defined as no cardiovascular disease, cancer, diabetes, hypertension, smoking, lipid-lowering medication or digoxin, as well as body mass index <30 kg m<sup>-2</sup> and urinary albumin-to-creatinine ratio < 30 mg g<sup>-1</sup>.

<sup>c</sup>Office systolic blood pressure ≥ 140 mm Hg, office diastolic blood pressure ≥ 90 mm Hg, or the use of antihypertensive medications.

**Table S3. General additive mixed model analysis of GFR mean and standard deviation in three population-based cohorts. Fixed and random effects.**

| Fixed effects                                                           |          |                         |            |         |
|-------------------------------------------------------------------------|----------|-------------------------|------------|---------|
| <i>Effect of independent variables on mean GFR</i>                      |          |                         |            |         |
| Variable                                                                | $\beta$  | 95% confidence interval |            | P-value |
| Unhealthy 50-year-old female (intercept)                                | 98.91    | 97.43 to 100.39         |            | <0.001  |
| Age, per year                                                           | -1.22    | -1.43 to -1.02          |            | <0.001  |
| Healthy (yes/no) <sup>a</sup>                                           | -3.25    | -4.86 to -1.63          |            | <0.001  |
| Male sex                                                                | -0.82    | -8.54 to 6.90           |            | 0.84    |
| Interaction between age and being healthy <sup>a</sup>                  | 0.30     | 0.18 to 0.43            |            | <0.001  |
| Interaction between age and male sex                                    | 0.20     | 0.06 to 0.34            |            | 0.005   |
| <i>Effect of independent variables on the standard deviation of GFR</i> |          |                         |            |         |
| Variable                                                                | $\beta$  | 95% confidence interval |            | P-value |
| Unhealthy 50-year-old female (intercept)                                | 12.40    | 10.53                   | to 14.61   | <0.001  |
| <i>Percent change associated with each independent variable</i>         |          |                         |            |         |
| Age, per year                                                           | -0.1 %   | -0.6 %                  | to 0.3 %   | 0.52    |
| Healthy (yes/no) <sup>a</sup>                                           | -18.6 %  | -23.9 %                 | to -13.0 % | <0.001  |
| Male sex                                                                | 1.4 %    | -3.5 %                  | to 6.6 %   | 0.59    |
| Random effects                                                          |          |                         |            |         |
| <i>Effect of independent variables on mean GFR</i>                      |          |                         |            |         |
| Variable                                                                | Estimate | 95% confidence interval |            | P-value |
| Cohort effect for males                                                 |          |                         |            |         |
| RENIS <sup>b</sup>                                                      | 6.59     | -0.67                   | to 13.85   | 0.07    |
| BIS <sup>b</sup>                                                        | -4.86    | -12.05                  | to 2.34    | 0.19    |
| AGES-Kidney <sup>b</sup>                                                | -1.73    | -8.95                   | to 5.48    | 0.64    |
| Standard deviation of random effect                                     | 6.16     | 2.19                    | to 17.28   | 0.003   |
| Interaction between cohort effect and age                               |          |                         |            |         |
| RENIS <sup>b</sup>                                                      | 0.19     | -0.01                   | to 0.39    | 0.06    |
| BIS <sup>b</sup>                                                        | -0.13    | -0.33                   | to 0.07    | 0.20    |
| AGES-Kidney <sup>b</sup>                                                | -0.06    | -0.26                   | to 0.13    | 0.54    |
| Standard deviation of random effect                                     | 0.17     | 0.06                    | to 0.47    | 0.03    |
| Random intercept, standard deviation                                    | 5.09     | 4.80                    | to 5.39    | <0.001  |
| <i>Effect of independent variables on the standard deviation of GFR</i> |          |                         |            |         |
| Variable                                                                | Estimate | 95% confidence interval |            | P-value |
| Cohort effect, percent change associated with each independent variable |          |                         |            |         |
| RENIS <sup>b</sup>                                                      | -15 %    | -26 %                   | to -2.1 %  | 0.02    |
| BIS <sup>b</sup>                                                        | 5.0 %    | -8.4 %                  | to 20 %    | 0.48    |
| AGES-Kidney <sup>b</sup>                                                | 12 %     | -2 %                    | to 28 %    | 0.11    |
| Standard deviation of random effect                                     | 12 %     | 3.7 %                   | to 41 %    | <0.001  |

Abbreviations: RENIS, Renal Iohexol Clearance Survey; BIS, Berlin Initiative Study; AGES-Kidney, Age, Gene/Environment Susceptibility - Kidney Study; GFR, glomerular filtration rate.

GFR measured in mL/min/1.73 m<sup>2</sup>. The fixed effect part of this table is identical to Table 3 in the main article.

<sup>a</sup>"Healthy" defined as no cardiovascular disease, cancer, diabetes, hypertension, smoking, lipid-lowering medication or digoxin, as well as body mass index <30 kg m<sup>-2</sup> and urinary albumin-to-creatinine ratio < 30 mg/g.

<sup>b</sup>Best linear unbiased predictions of effects.

**Table S4. General additive mixed model analysis of GFR mean and standard deviation in three population-based cohorts. Fixed cohort effects.**

| <i>Effect of independent variables on mean GFR</i>                      |         |                         |         |
|-------------------------------------------------------------------------|---------|-------------------------|---------|
| Variable                                                                | $\beta$ | 95% confidence interval | P-value |
| Unhealthy 50-year-old female (intercept)                                | 98.87   | 97.37 to 100.37         | <0.001  |
| Age, per year                                                           | -1.22   | -1.30 to -1.14          | <0.001  |
| Healthy (yes/no) <sup>a</sup>                                           | -3.22   | -4.84 to -1.59          | <0.001  |
| Male sex                                                                | -0.96   | -4.36 to 2.44           | 0.58    |
| Interaction between age and being healthy <sup>a</sup>                  | 0.30    | 0.18 to 0.42            | <0.001  |
| Interaction between age and male sex                                    | 0.20    | 0.06 to 0.34            | 0.004   |
| Male in the RENIS cohort                                                | 6.69    | 4.60 to 8.78            | <0.001  |
| Male in the BIS cohort                                                  | -4.92   | -6.77 to -3.08          | <0.001  |
| Male in the AGES-Kidney cohort                                          | -1.77   | -3.70 to 0.17           | 0.07    |
| Age, per year, in the RENIS cohort                                      | 0.19    | 0.14 to 0.25            | <0.001  |
| Age, per year, in the BIS cohort                                        | -0.13   | -0.18 to -0.08          | <0.001  |
| Age, per year, in the AGES-Kidney cohort                                | -0.06   | -0.11 to -0.02          | 0.006   |
| <i>Effect of independent variables on the standard deviation of GFR</i> |         |                         |         |
| Variable                                                                | $\beta$ | 95% confidence interval | P-value |
| Unhealthy 50-year-old female (intercept)                                | 12.98   | 11.68 to 14.44          | <0.001  |
| <i>Percent change associated with each independent variable</i>         |         |                         |         |
| Age, per year                                                           | -0.3 %  | -0.8 % to 0.1 %         | 0.14    |
| Healthy (yes/no) <sup>a</sup>                                           | -18 %   | -24 % to -13 %          | <0.001  |
| Male sex                                                                | 1.5 %   | -3.4 % to 6.7 %         | 0.56    |
| RENIS cohort                                                            | -18 %   | -23 % to -12 %          | <0.001  |
| BIS cohort                                                              | 6 %     | 1 % to 12 %             | 0.02    |
| AGES-Kidney cohort                                                      | 14 %    | 8 % to 21 %             | <0.001  |

Abbreviations: RENIS, Renal Iohexol Clearance Survey; BIS, Berlin Initiative Study; AGES-Kidney, Age, Gene/Environment Susceptibility - Kidney Study; GFR, glomerular filtration rate.

GFR measured in mL/min/1.73 m<sup>2</sup>. This model is identical to the model in Table S3, but uses fixed instead of random cohort effects.

The standard deviation of the random intercept in this model was 5.09 (95% confidence interval 4.81 to 5.39).

<sup>a</sup>"Healthy" defined as no cardiovascular disease, cancer, diabetes, hypertension, smoking, lipid-lowering medication or digoxin, as well as body mass index <30 kg m<sup>-2</sup> and urinary albumin-to-creatinine ratio < 30 mg/g.



**Table S5. Predicted percentiles of GFR (mL/min/1.73 m<sup>2</sup>) for healthy women and men according to age group<sup>a</sup>.**

| Age group (years) | Women           |                 |                 |                 | Men             |                 |                 |                 |
|-------------------|-----------------|-----------------|-----------------|-----------------|-----------------|-----------------|-----------------|-----------------|
|                   | 10th percentile | 25th percentile | 75th percentile | 90th percentile | 10th percentile | 25th percentile | 75th percentile | 90th percentile |
| 50 to 54          | 80.5            | 86.6            | 100.2           | 106.3           | 80.0            | 86.2            | 99.9            | 106.1           |
| 55 to 59          | 76.0            | 82.0            | 95.5            | 101.6           | 76.5            | 82.6            | 96.3            | 102.4           |
| 60 to 64          | 71.5            | 77.5            | 90.9            | 96.9            | 72.9            | 79.0            | 92.6            | 98.7            |
| 65 to 69          | 67.0            | 72.9            | 86.2            | 92.2            | 69.4            | 75.5            | 89.0            | 95.0            |
| 70 to 74          | 62.4            | 68.4            | 81.6            | 87.5            | 65.9            | 71.9            | 85.3            | 91.3            |
| 75 to 79          | 57.9            | 63.8            | 76.9            | 82.8            | 62.4            | 68.4            | 81.6            | 87.6            |
| 80 to 84          | 53.4            | 59.3            | 72.3            | 78.1            | 58.9            | 64.8            | 78.0            | 83.9            |
| 85 to 89          | 48.9            | 54.7            | 67.6            | 73.5            | 55.4            | 61.2            | 74.3            | 80.2            |
| >=90              | 44.4            | 50.2            | 63.0            | 68.8            | 51.8            | 57.7            | 70.7            | 76.5            |

<sup>a</sup>Estimates based on the model in Table 3 in the main article.

**Table S6. General additive mixed model analysis of creatinine-based eGFR mean and standard deviation in three population-based cohorts. Fixed and random effects.**

| Fixed effects                                                            |          |                         |            |         |
|--------------------------------------------------------------------------|----------|-------------------------|------------|---------|
| <i>Effect of independent variables on mean eGFR</i>                      |          |                         |            |         |
| Variable                                                                 | $\beta$  | 95% confidence interval |            | P-value |
| Unhealthy 50-year-old female (intercept)                                 | 101.92   | 100.91                  | to 102.92  | <0.001  |
| Age, per year                                                            | -1.13    | -1.29                   | to -0.97   | <0.001  |
| Healthy (yes/no) <sup>a</sup>                                            | -1.87    | -3.02                   | to -0.71   | 0.002   |
| Male sex                                                                 | 0.83     | -0.22                   | to 1.87    | 0.12    |
| Interaction between age and being healthy <sup>a</sup>                   | 0.19     | 0.10                    | to 0.29    | <0.001  |
| Interaction between age and male sex                                     | 0.00     | -0.07                   | to 0.08    | 0.905   |
| <i>Effect of independent variables on the standard deviation of eGFR</i> |          |                         |            |         |
| Variable                                                                 | $\beta$  | 95% confidence interval |            | P-value |
| Unhealthy 50-year-old female (intercept)                                 | 10.28    | 7.45                    | to 14.20   | <0.001  |
| <i>Percent change associated with each independent variable</i>          |          |                         |            |         |
| Age, per year                                                            | 1.0 %    | 0.5 %                   | to 1.4 %   | <0.001  |
| Healthy (yes/no) <sup>a</sup>                                            | -21.5 %  | -26.7 %                 | to -15.9 % | <0.001  |
| Male sex                                                                 | -15.0 %  | -19.3 %                 | to -10.5 % | <0.001  |
| Random effects                                                           |          |                         |            |         |
| <i>Effect of independent variables on mean eGFR</i>                      |          |                         |            |         |
| Variable                                                                 | Estimate | 95% confidence interval |            | P-value |
| Cohort effect for males                                                  |          |                         |            |         |
| RENIS <sup>b</sup>                                                       | 0.00     | -0.02                   | to 0.02    | 0.99    |
| BIS <sup>b</sup>                                                         | 0.00     | -0.02                   | to 0.02    | 0.99    |
| AGES-Kidney <sup>b</sup>                                                 | 0.00     | -0.02                   | to 0.02    | 1.00    |
| Standard deviation of random effect                                      | 0.01     | 0.01                    | to 0.01    | 0.06    |
| Interaction between cohort effect and age                                |          |                         |            |         |
| RENIS <sup>b</sup>                                                       | 0.14     | -0.01                   | to 0.29    | 0.07    |
| BIS <sup>b</sup>                                                         | -0.05    | -0.20                   | to 0.10    | 0.49    |
| AGES-Kidney <sup>b</sup>                                                 | -0.09    | -0.24                   | to 0.06    | 0.25    |
| Standard deviation of random effect                                      | 0.13     | 0.05                    | to 0.35    | <0.001  |
| Random intercept, standard deviation                                     | 3.56     | 3.40                    | to 3.72    | <0.001  |
| <i>Effect of independent variables on the standard deviation of eGFR</i> |          |                         |            |         |
| Variable                                                                 | Estimate | 95% confidence interval |            | P-value |
| Cohort effect, percent change associated with each independent variable  |          |                         |            |         |
| RENIS <sup>b</sup>                                                       | -31 %    | -50 %                   | to -6.4 %  | 0.02    |
| BIS <sup>b</sup>                                                         | 22.0 %   | -10.4 %                 | to 66 %    | 0.21    |
| AGES-Kidney <sup>b</sup>                                                 | 20 %     | -12 %                   | to 63 %    | 0.26    |
| Standard deviation of random effect                                      | 31 %     | 10.4 %                  | to 108 %   | <0.001  |

Abbreviations: RENIS, Renal Iohexol Clearance Survey; BIS, Berlin Initiative Study; AGES-Kidney, Age, Gene/Environment Susceptibility - Kidney Study; eGFR, estimated glomerular filtration rate.

eGFR measured in mL/min/1.73 m<sup>2</sup>.

<sup>a</sup>"Healthy" defined as no cardiovascular disease, cancer, diabetes, hypertension, smoking, lipid-lowering medication or digoxin, as well as body mass index <30 kg m<sup>-2</sup> and urinary albumin-to-creatinine ratio < 30 mg/g.

<sup>b</sup>Best linear unbiased predictions of effects.

## Figure Legends

Figure S1. Histogram showing the residuals for the final GAMLSS model of GFR corresponding to Table 3 in the main article.

Figure S2. GFR-age association for the GAMLSS models, stratified according to age and sex.

Figures

Figure S1.

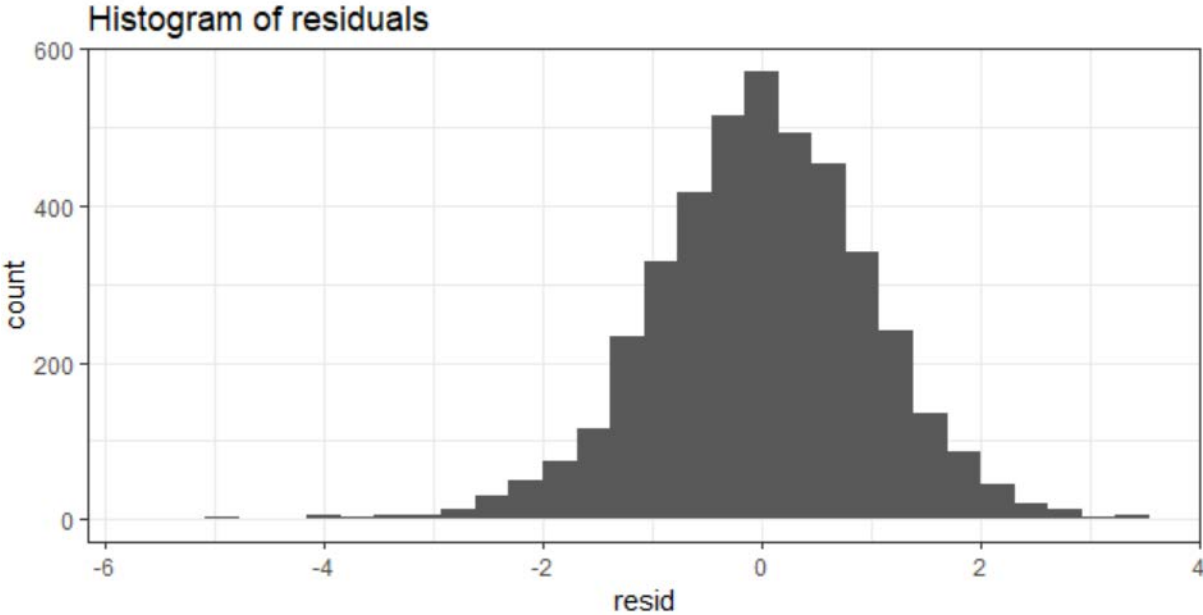

Figure S2.

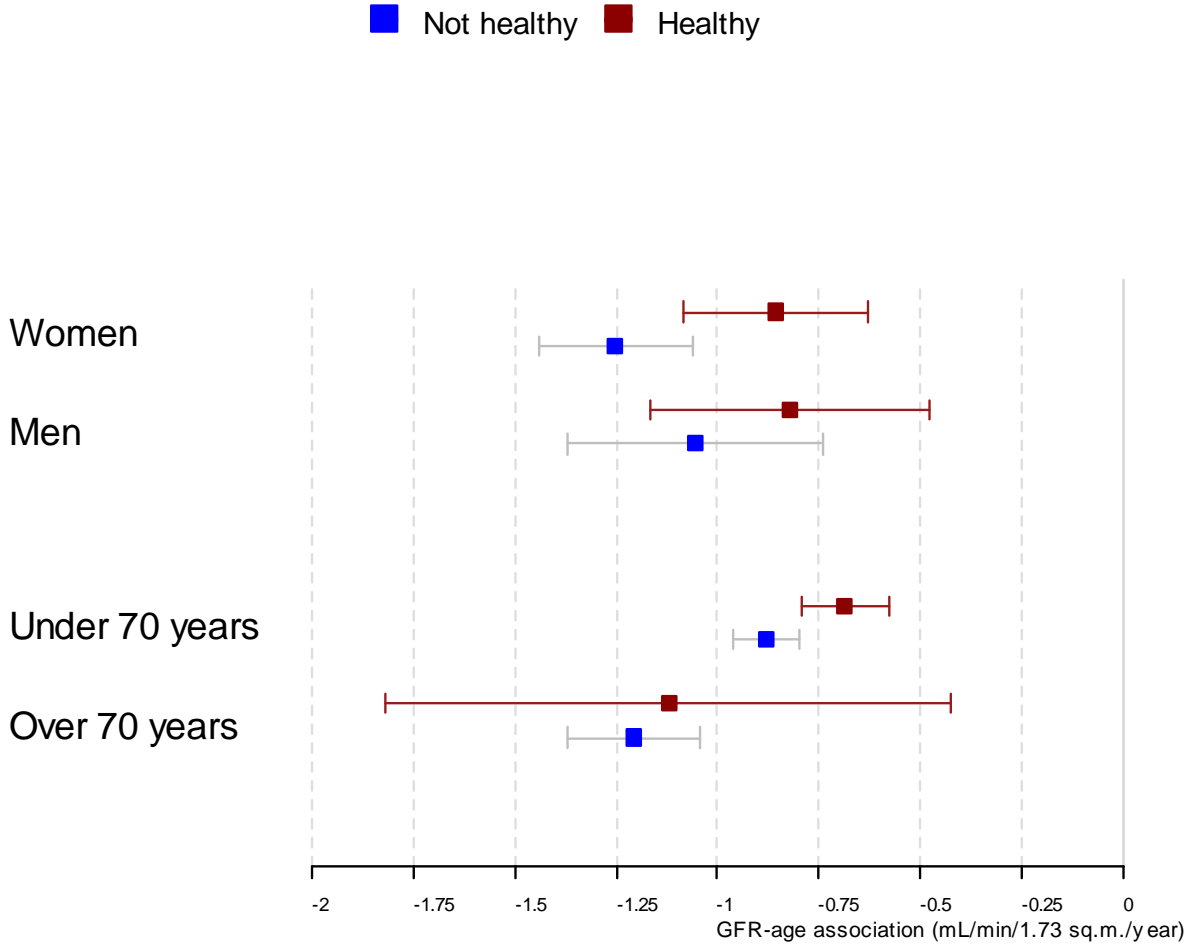

Supplement: ASN.2020020151SupplementaryData.pdf [file ASN.2020020151SupplementaryData.pdf]
